# Supplementary material
Source: PubMed Central journal article supplement (PMC6015867)
Supplement: rspb20180038supp1.pdf [file rspb20180038supp1.pdf]

# The strength of the biodiversity ecosystem function relationship depends on spatial scale

Patrick L Thompson, Forest Isbell, Michel Loreau, Mary O'Connor, Andrew Gonzalez

*Proceedings of the Royal Society of London B*

## Supplementary Figures

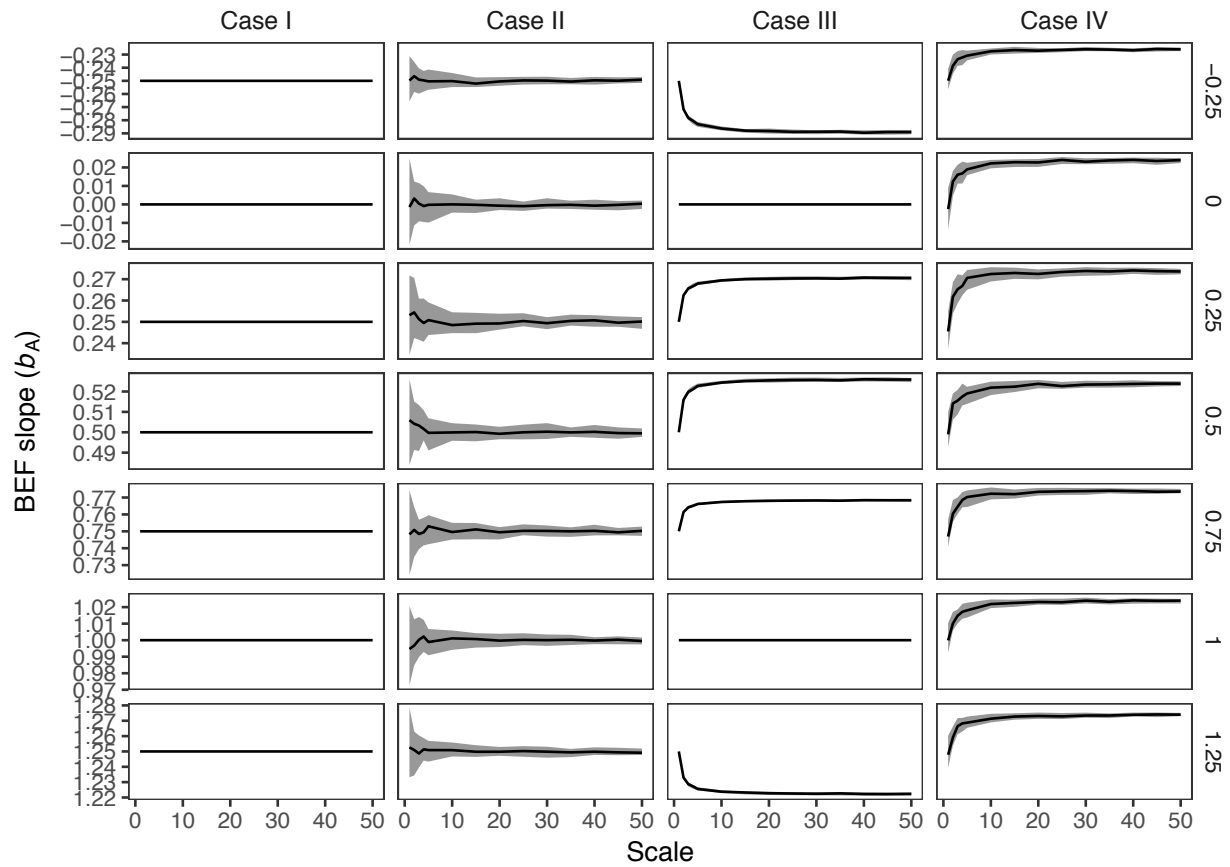

**Figure S1.** The relationship between  $b_A$  and spatial scale in cases I – IV. Each row of the figure corresponds to a different mean local slope  $\bar{b}_l$ . The solid lines show the median value of  $b_A$  and the bands show the interquartile range based on 100 replicate simulations.

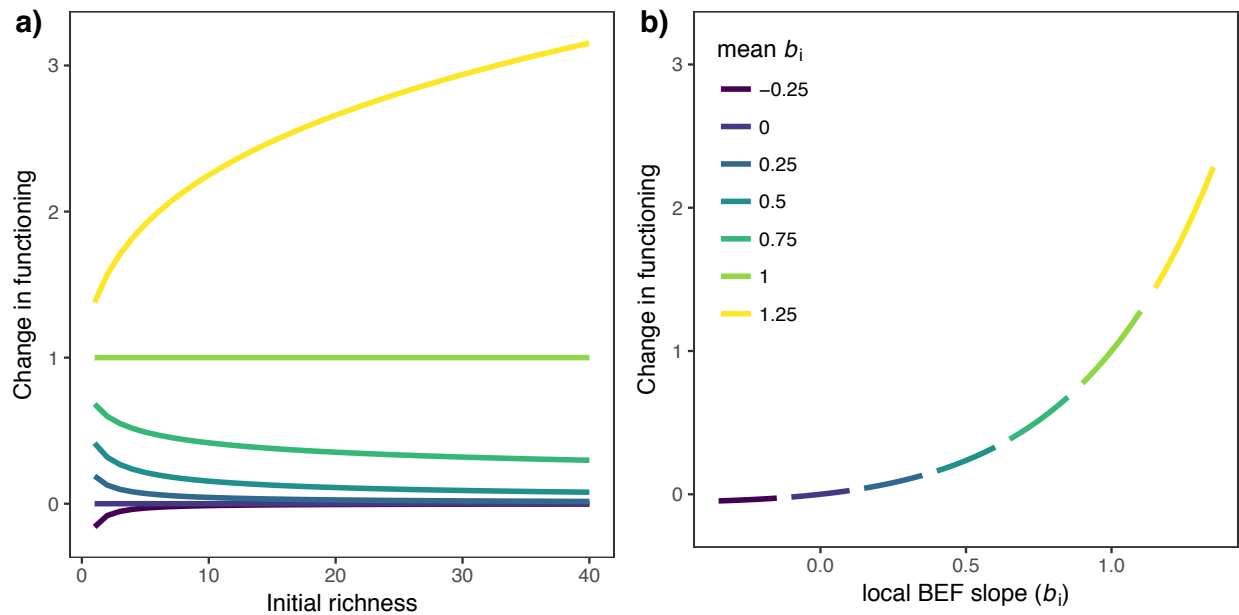

**Figure S2.** Change in local ecosystem function with the loss of one species from each patch vs. either (a) initial local species richness or (b) the strength of within-patch local biodiversity effects,  $b$ . Panels (a) and (b) respectively correspond to cases III and IV. Panel (b) shows the effect of changing local within-patch richness from 15 to 14 species.

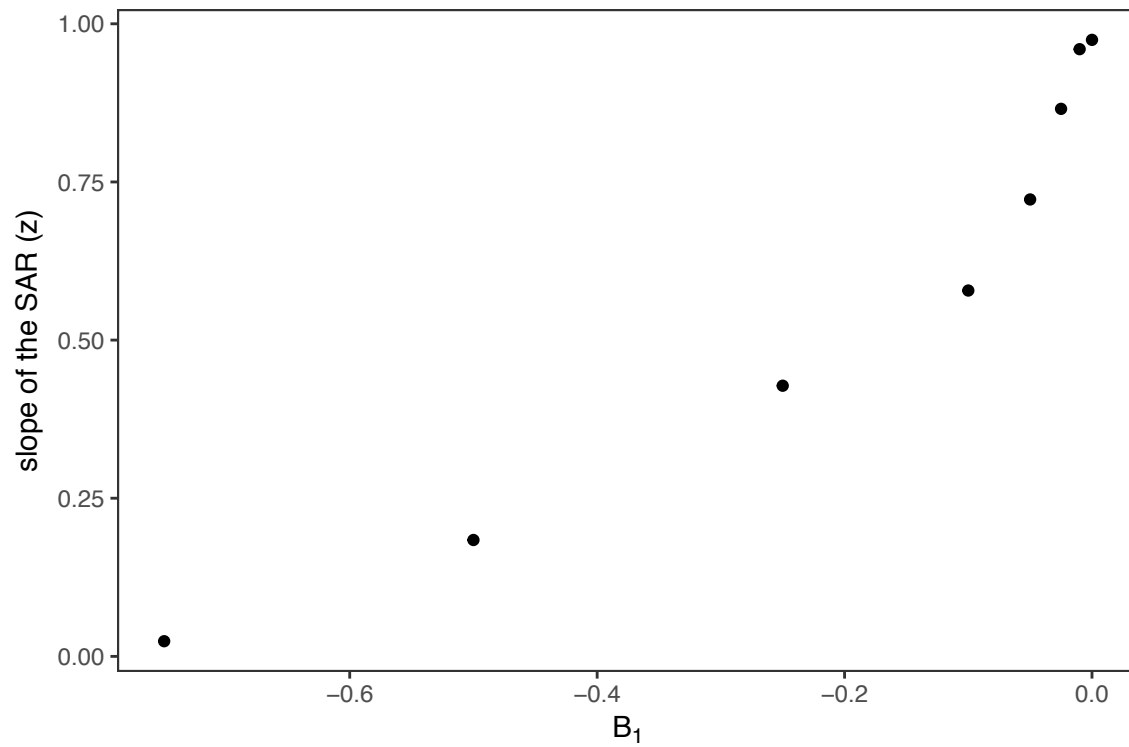

**Figure S3.** The relationship between  $B_1$  and the slope of the species area relationship  $z$ . This was estimated by simulating regions with different values of  $B_1$  and estimating  $z$  as the slope of the species accumulation curve in 25 replicate regions.

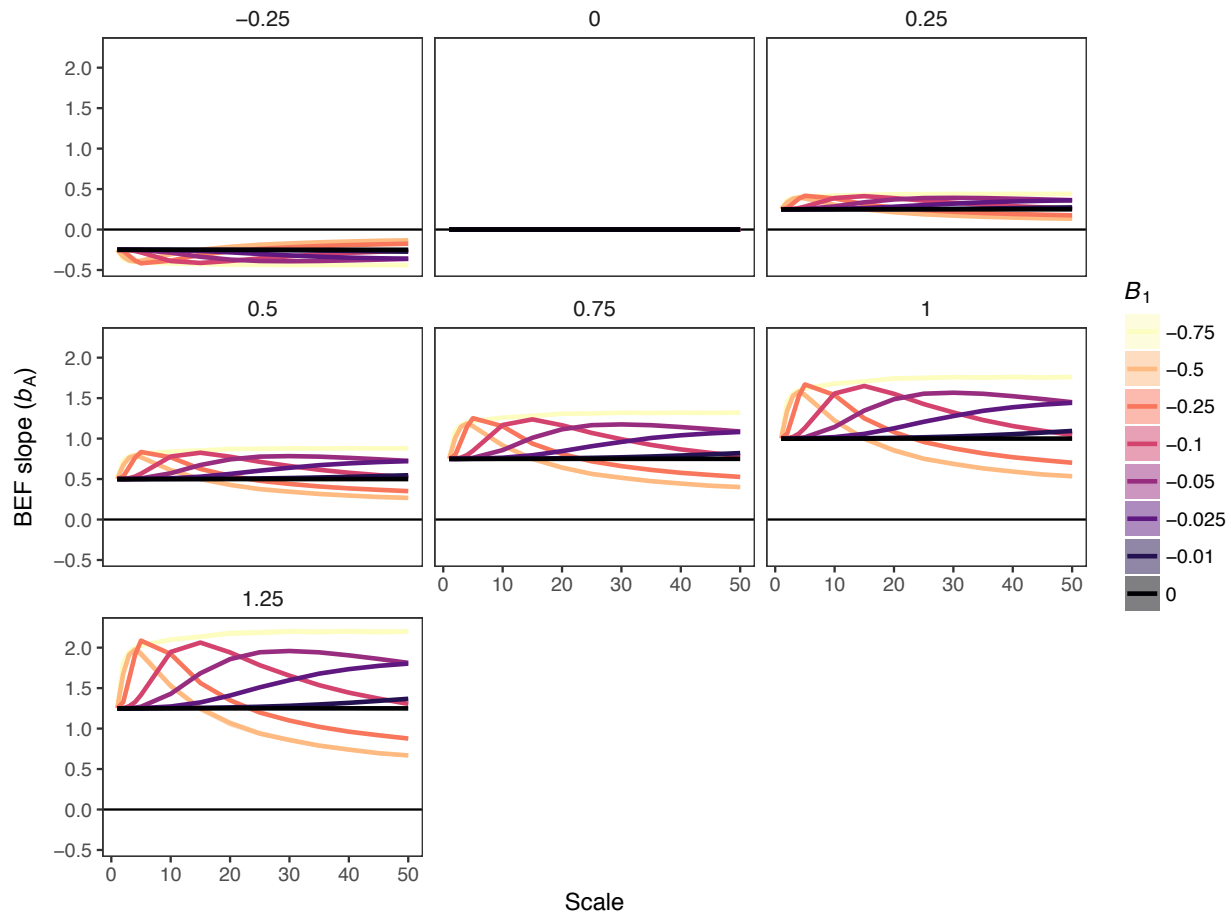

**Figure S4.** The strength of biodiversity effects,  $b_A$ , at different spatial scales when there is incomplete compositional overlap across local patches. Each panel represents a different mean local slope  $\bar{b}_l$ , as indicated by the number above the panels. Different degrees of compositional overlap are indicated with the colours (low values of  $B_l$  correspond to high overlap,  $B_l = 0$  indicates no overlap). The solid line indicates the median across 100 replicate simulations each consisting of 2000 replicate regions at each scale. The bands show the interquartile range.
